# Supplementary material for: Molecular determinants of pro-arrhythmia proclivity of d- and l-sotalol via a multi-scale modeling pipeline
Source: PubMed Central journal article supplement — J Mol Cell Cardiol. Author manuscript; Available in PMC 2022 Mar 9. (PMC8906354; doi:10.1016/j.yjmcc.2021.05.015), 2021-05-29
Supplement: NIHMS1782625-supplement-2.pdf [file NIHMS1782625-supplement-2.pdf]

## **DATA SUPPLEMENT**

### **Molecular determinants of pro-arrhythmia proclivity of d- and l-sotalol via a multi-scale modeling pipeline**

Kevin R. DeMarco<sup>1</sup>, Pei-Chi Yang<sup>1</sup>, Vikrant Singh<sup>2</sup>, Kazuharu Furutani<sup>1,3</sup>, John R. D. Dawson<sup>1,4</sup>,  
Mao-Tsuen Jeng<sup>1</sup>, James C. Fetting<sup>5</sup>, Slava Bekker<sup>1,6</sup>, Van A. Ngo<sup>7</sup>, Sergei Y. Noskov<sup>7</sup>,  
Vladimir Yarov-Yarovoy<sup>1,8</sup>, Jon T. Sack<sup>1,8</sup>, Heike Wulff<sup>2</sup>, Colleen E. Clancy<sup>1,2</sup> and Igor Vorobyov<sup>1,2\*</sup>

<sup>1</sup> Department of Physiology and Membrane Biology, University of California Davis, Davis, CA 95616, USA

<sup>2</sup> Department of Pharmacology, University of California Davis, Davis, CA 95616, USA

<sup>3</sup> Department of Pharmacology, Faculty of Pharmaceutical Sciences, Tokushima Bunri University, Tokushima, Tokushima 770-8514, Japan

<sup>4</sup> Biophysics Graduate Group, University of California Davis, Davis, CA 95616, USA

<sup>5</sup> Department of Chemistry, University of California Davis, Davis, CA 95616, USA

<sup>6</sup> Department of Science and Engineering, American River College, Sacramento, CA 95841, USA

<sup>7</sup> Centre for Molecular Simulation and Biochemistry Research Cluster, Department of Biological Sciences, University of Calgary, Calgary, AB T2N1N4, Canada

<sup>8</sup> Department of Anesthesiology and Pain Medicine, University of California Davis, Davis, CA 95616, USA

\* Correspondence to:

Igor Vorobyov  
University of California, Davis  
Department of Physiology and Membrane Biology  
4303 Tupper Hall,  
One Shields Ave,  
Davis, CA 95616-8636, USA

E-mail: [ivorobyov@ucdavis.edu](mailto:ivorobyov@ucdavis.edu)

## Racemic Sotalol Free Base

CAS: 3930-20-9  
mp = 139.5-140.6 °C (obs.)  
No reported melting point in literature  
Amorphous white solid

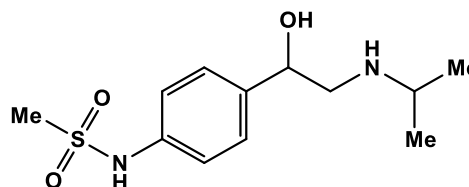

## Sotalol Free Base Enantiomers

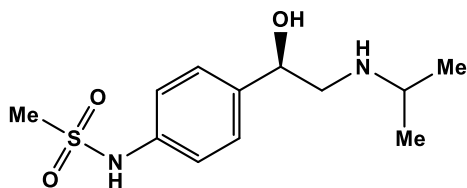

(*R*)-*N*-(4-(1-hydroxy-2-(isopropylamino)ethyl)phenyl)methanesulfonamide

CAS: 30236-32-9

(*R*)-sotalol, (-)-sotalol, *l*-sotalol, D-sotalol

$[\alpha]_D^{25} = 35.3$  ( $c = 0.31$  in CH<sub>3</sub>OH)

No XRD

ee 99.6 %

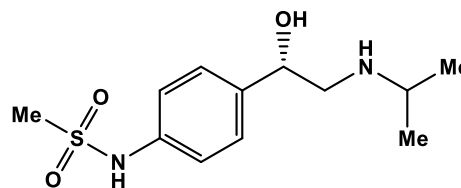

(*S*)-*N*-(4-(1-hydroxy-2-(isopropylamino)ethyl)phenyl)methanesulfonamide

CAS: 30236-31-8

(*S*)-sotalol, (+)-sotalol, *d*-sotalol, L-sotalol

$[\alpha]_D^{25} = +17.4$  ( $c = 0.32$  in CH<sub>3</sub>OH)

XRD confirmation of structure

ee 100 %

After resolution, enantiomeric excess (ee) of both the enantiomers was determined by chiral HPLC.

HRMS confirms the mol. wt. and molecular formula of both the enantiomers.

### <sup>1</sup>H- and <sup>13</sup>C-NMR spectra of free base sotalol and (*S*)- and (*R*)-sotalol

*See attached spectra at the end of this file.*

### HRMS spectra of free base sotalol and (*S*)- and (*R*)-sotalol

*See attached spectra at the end of this file.*

## Quantitative HPLC separation of sotalol enantiomers at increasing concentrations

Chiral HPLC resolution of sotalol enantiomers was performed with an Agilent 1100 series HPLC equipped with a Chiralpak IA 4.6 X 250 mm analytical column. Though peak broadening was observed with increasing concentration, the separation between the two enantiomers was good enough, even at 220 mM conc., to use an analytical column for quantitative separation.

**Separation of  
sotalol enantiomers  
at 10 mM**

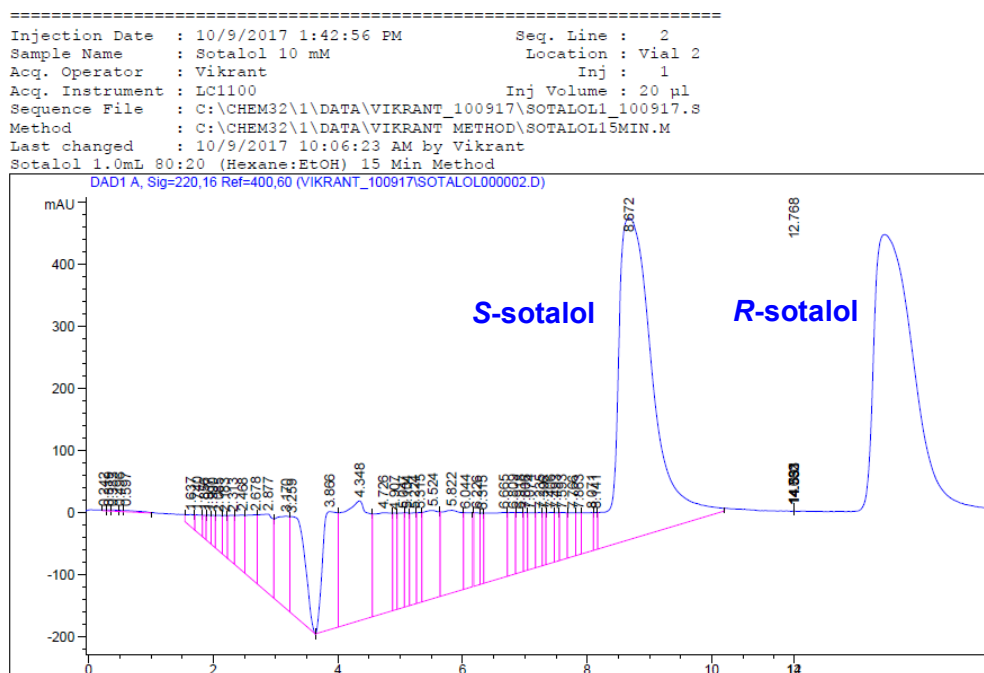

**Separation of  
sotalol enantiomers  
at 100 mM**

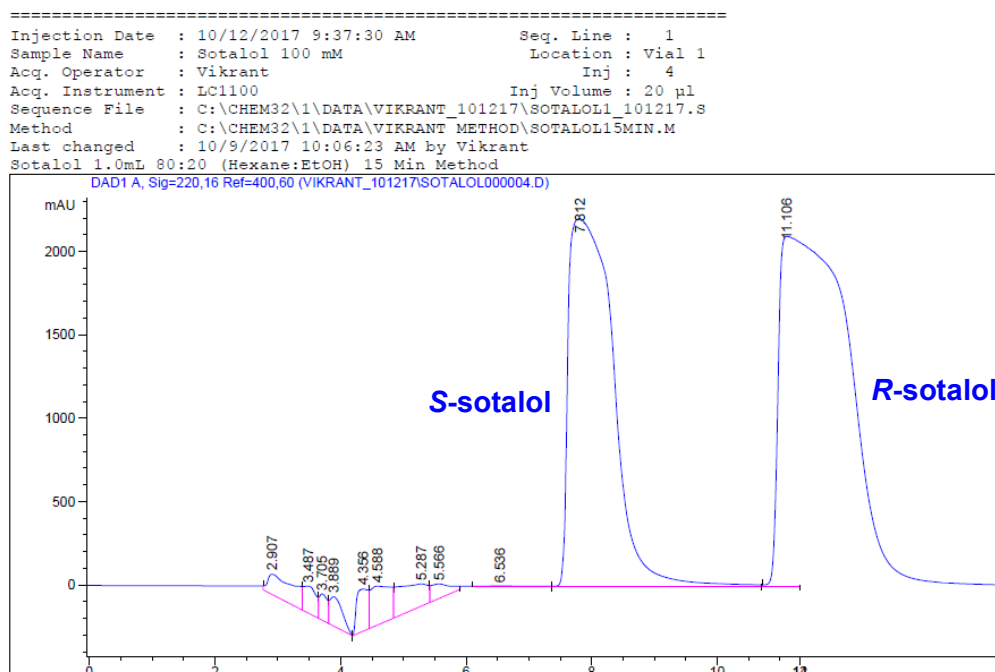

```

=====
Injection Date : 10/13/2017 10:44:41 AM      Seq. Line : 1
Sample Name   : Sotalol 160 mM              Location  : Vial 1
Acq. Operator : Vikrant                      Inj       : 5
Acq. Instrument : LC1100                     Inj Volume: 20 µl
Sequence File : C:\CHEM32\1\DATA\VIKRANT_101217\SOTALOL4_101217.S
Method        : C:\CHEM32\1\DATA\VIKRANT METHOD\SOTALOL15MIN.M
Last changed  : 10/9/2017 10:06:23 AM by Vikrant
Sotalol 1.0mL 80:20 (Hexane:EtOH) 15 Min Method

```

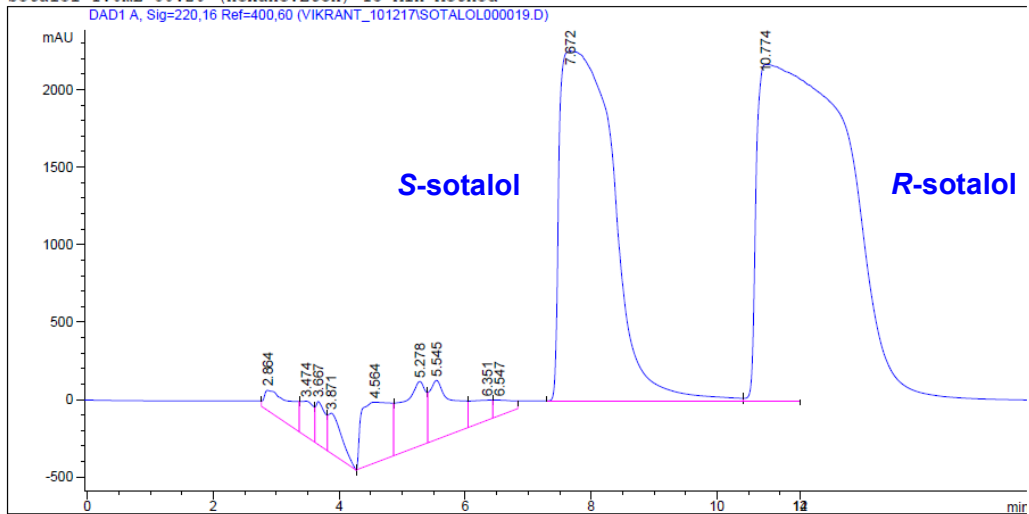

**Separation of  
sotalol enantiomers  
at 160 mM**

```

=====
Injection Date : 10/17/2017 4:48:04 PM      Seq. Line : 1
Sample Name   : Sotalol 220 mM              Location  : Vial 1
Acq. Operator : Vikrant                      Inj       : 2
Acq. Instrument : LC1100                     Inj Volume: 20 µl
Sequence File : C:\CHEM32\1\DATA\VIKRANT_101217\SOTALOL9_101217.S
Method        : C:\CHEM32\1\DATA\VIKRANT METHOD\SOTALOL15MIN.M
Last changed  : 10/9/2017 10:06:23 AM by Vikrant
Sotalol 1.0mL 80:20 (Hexane:EtOH) 15 Min Method

```

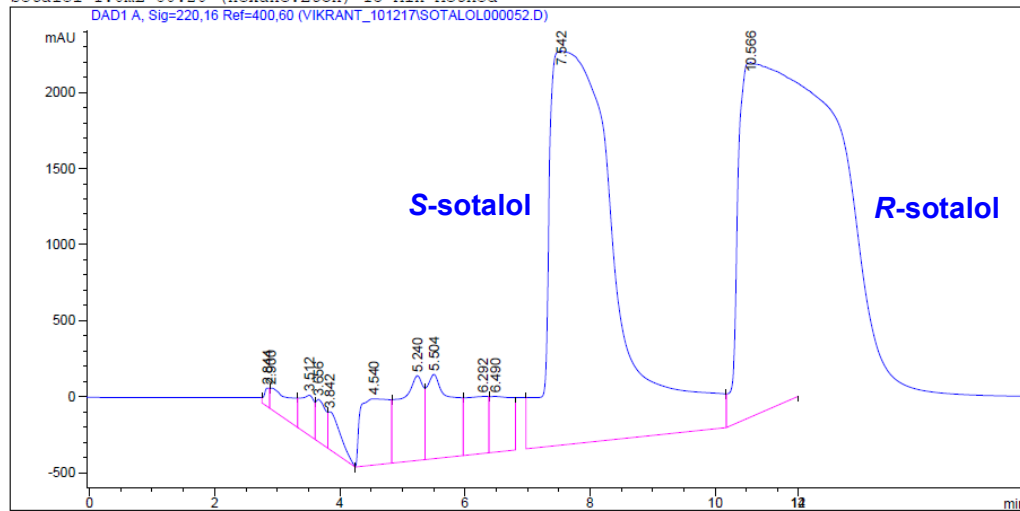

**Separation of  
sotalol enantiomers  
at 220 mM**

## Chiral HPLC chromatograms showing successful separation of *R*- and *S*-sotalol

Sotalol Peak-1, Approx 3mg/mL

```
=====
Injection Date : 11/2/2017 12:09:52 PM      Seq. Line : 1
Sample Name    : Sotalol Peak 1              Location  : Vial 1
Acq. Operator  : Vikrant                     Inj       : 1
Acq. Instrument: LC1100                      Inj Volume: 20 µl
Sequence File  : C:\CHEM32\1\DATA\VIKRANT 102117\SOTALOL EEDETERMINATION_110217.S
Method        : C:\CHEM32\1\DATA\VIKRANT METHOD\SOTALOL15MIN.M
Last changed   : 11/2/2017 12:01:53 PM by Vikrant
Sotalol 1.0mL 80:20 (Hexane:EtOH) 15 Min Method
DAD1 A, Sig=220,16 Ref=400,60 (VIKRANT_102117\SOTALOL000101.D)
```

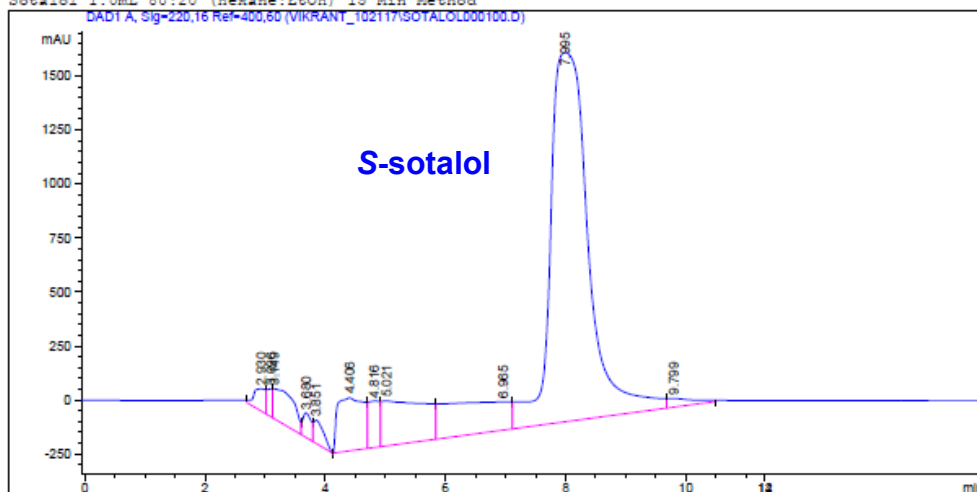

Sotalol Peak-2, Approx 3mg/mL

```
=====
Injection Date : 11/2/2017 12:26:25 PM      Seq. Line : 2
Sample Name    : Sotalol Peak 1              Location  : Vial 2
Acq. Operator  : Vikrant                     Inj       : 1
Acq. Instrument: LC1100                      Inj Volume: 20 µl
Sequence File  : C:\CHEM32\1\DATA\VIKRANT 102117\SOTALOL EEDETERMINATION_110217.S
Method        : C:\CHEM32\1\DATA\VIKRANT METHOD\SOTALOL15MIN.M
Last changed   : 11/2/2017 12:01:53 PM by Vikrant
Sotalol 1.0mL 80:20 (Hexane:EtOH) 15 Min Method
DAD1 A, Sig=220,16 Ref=400,60 (VIKRANT_102117\SOTALOL000101.D)
```

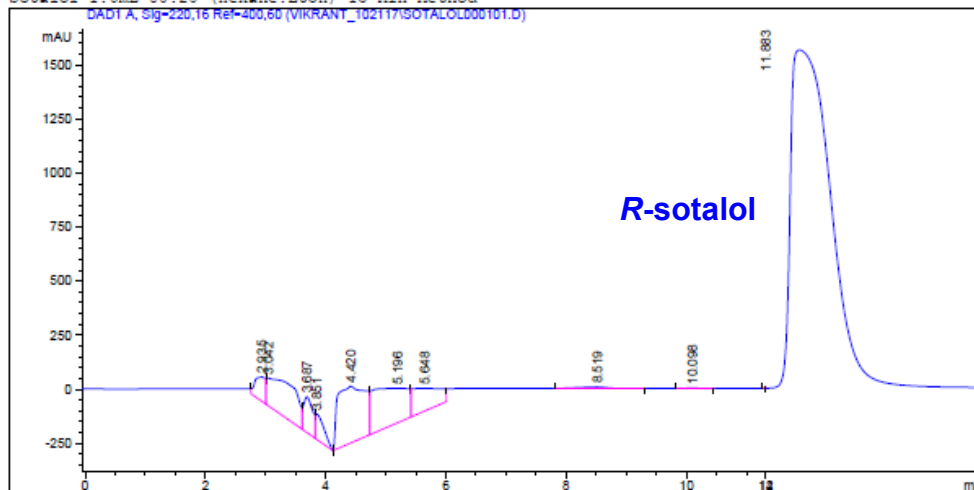

## Single crystal X-ray diffraction analysis of (S)-sotalol

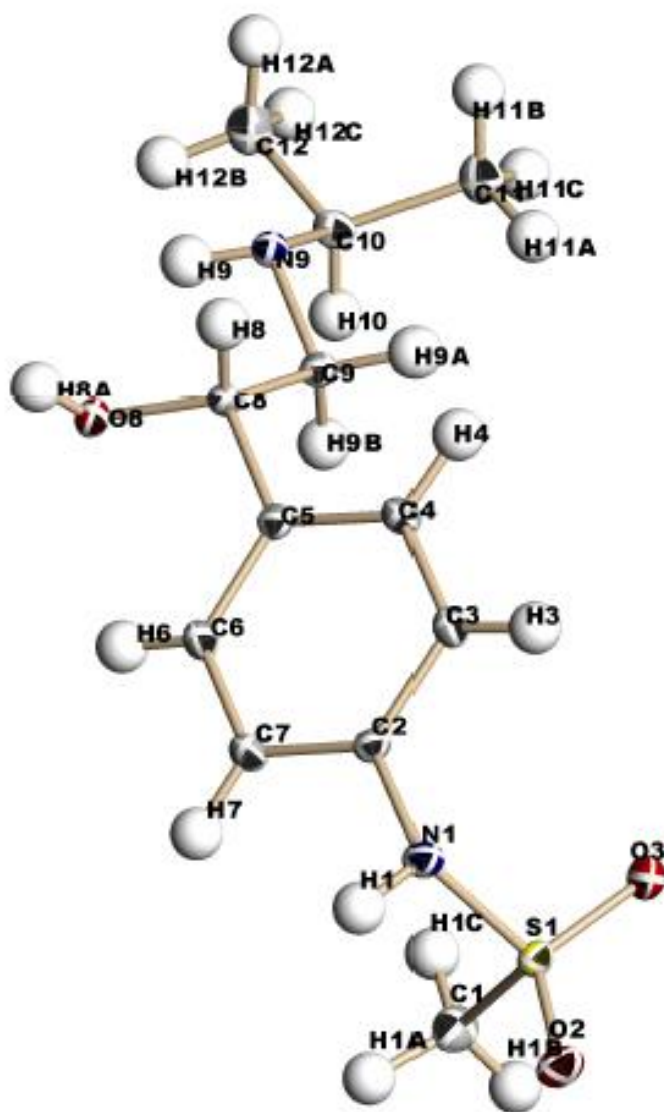

*Atomic coordinates in the PDB format are provided on the next page and were also deposited to the Cambridge Structural Database with Deposition Number 2087412*

REMARK JF2692FMI\_s\_sotalol.pdb

|        |          |          |          |        |        |          |          |      |     |   |
|--------|----------|----------|----------|--------|--------|----------|----------|------|-----|---|
| CRYST1 | 9.850    | 5.995    | 12.284   | 90.00  | 107.16 | 90.00    | P 1 21 1 | 2    |     |   |
| SCALE1 | 0.101525 | 0.000000 | 0.031354 |        |        | 0.000000 |          |      |     |   |
| SCALE2 | 0.000000 | 0.166817 | 0.000000 |        |        | 0.000000 |          |      |     |   |
| SCALE3 | 0.000000 | 0.000000 | 0.085197 |        |        | 0.000000 |          |      |     |   |
| ATOM   | 1        | S1       | 0        | -0.102 | 3.939  | 6.346    | 1.000    | 1.34 | S   |   |
| ANISOU | 1        | S1       | 0        | 190    | 144    | 144      | 20       | 33   | -12 | S |
| ATOM   | 2        | N1       | 0        | -0.394 | 3.310  | 4.865    | 1.000    | 1.32 | N   |   |
| ANISOU | 2        | N1       | 0        | 143    | 175    | 152      | -21      | 23   | -10 | N |
| ATOM   | 3        | H1       | 0        | -0.992 | 2.661  | 4.916    | 1.000    | 1.28 | H   |   |
| ATOM   | 4        | C1       | 0        | 0.852  | 2.737  | 7.223    | 1.000    | 1.94 | C   |   |
| ANISOU | 4        | C1       | 0        | 278    | 216    | 199      | 59       | -18  | 11  | C |
| ATOM   | 5        | H1A      | 0        | 0.328  | 1.874  | 7.252    | 1.000    | 2.81 | H   |   |
| ATOM   | 6        | H1B      | 0        | 0.986  | 3.065  | 8.060    | 1.000    | 1.71 | H   |   |
| ATOM   | 7        | H1C      | 0        | 1.682  | 2.639  | 6.734    | 1.000    | 1.92 | H   |   |
| ATOM   | 8        | C2       | 0        | 0.737  | 3.027  | 4.014    | 1.000    | 1.20 | C   |   |
| ANISOU | 8        | C2       | 0        | 134    | 164    | 132      | -17      | 19   | -15 | C |
| ATOM   | 9        | O2       | 0        | -1.388 | 4.042  | 6.985    | 1.000    | 1.97 | O   |   |
| ANISOU | 9        | O2       | 0        | 252    | 236    | 216      | 54       | 82   | -8  | O |
| ATOM   | 10       | C3       | 0        | 1.312  | 4.055  | 3.279    | 1.000    | 1.37 | C   |   |
| ANISOU | 10       | C3       | 0        | 177    | 132    | 180      | -10      | -2   | 2   | C |
| ATOM   | 11       | H3       | 0        | 0.911  | 4.931  | 3.372    | 1.000    | 1.18 | H   |   |
| ATOM   | 12       | O3       | 0        | 0.693  | 5.119  | 6.193    | 1.000    | 1.93 | O   |   |
| ANISOU | 12       | O3       | 0        | 310    | 181    | 200      | -48      | 31   | -39 | O |
| ATOM   | 13       | C4       | 0        | 2.388  | 3.787  | 2.442    | 1.000    | 1.33 | C   |   |
| ANISOU | 13       | C4       | 0        | 171    | 137    | 169      | -25      | 19   | 10  | C |
| ATOM   | 14       | H4       | 0        | 2.772  | 4.530  | 1.943    | 1.000    | 2.05 | H   |   |
| ATOM   | 15       | C5       | 0        | 2.897  | 2.490  | 2.331    | 1.000    | 1.16 | C   |   |
| ANISOU | 15       | C5       | 0        | 142    | 147    | 127      | -19      | -1   | -13 | C |
| ATOM   | 16       | C6       | 0        | 2.310  | 1.476  | 3.069    | 1.000    | 1.52 | C   |   |
| ANISOU | 16       | C6       | 0        | 211    | 127    | 206      | 0        | 49   | 0   | C |
| ATOM   | 17       | H6       | 0        | 2.656  | 0.643  | 3.041    | 1.000    | 2.73 | H   |   |
| ATOM   | 18       | C7       | 0        | 1.236  | 1.733  | 3.920    | 1.000    | 1.52 | C   |   |
| ANISOU | 18       | C7       | 0        | 194    | 148    | 199      | -32      | 51   | 11  | C |
| ATOM   | 19       | H7       | 0        | 0.858  | 1.026  | 4.433    | 1.000    | 1.90 | H   |   |
| ATOM   | 20       | C8       | 0        | 4.084  | 2.220  | 1.417    | 1.000    | 1.21 | C   |   |
| ANISOU | 20       | C8       | 0        | 159    | 133    | 140      | -17      | 19   | -2  | C |
| ATOM   | 21       | H8       | 0        | 3.907  | 2.515  | 0.543    | 1.000    | 1.19 | H   |   |
| ATOM   | 22       | O8       | 0        | 4.403  | 0.836  | 1.344    | 1.000    | 1.31 | O   |   |
| ANISOU | 22       | O8       | 0        | 171    | 140    | 157      | -1       | 14   | -26 | O |
| ATOM   | 23       | H8A      | 0        | 4.025  | 0.505  | 0.681    | 1.000    | 2.37 | H   |   |
| ATOM   | 24       | N9       | 0        | 6.446  | 2.715  | 0.993    | 1.000    | 1.19 | N   |   |
| ANISOU | 24       | N9       | 0        | 132    | 144    | 151      | -12      | 18   | -9  | N |
| ATOM   | 25       | H9       | 0        | 6.484  | 1.879  | 0.874    | 1.000    | 1.09 | H   |   |
| ATOM   | 26       | C9       | 0        | 5.324  | 2.965  | 1.910    | 1.000    | 1.28 | C   |   |
| ANISOU | 26       | C9       | 0        | 148    | 167    | 141      | -20      | 21   | -11 | C |
| ATOM   | 27       | H9A      | 0        | 5.139  | 3.964  | 1.944    | 1.000    | 1.76 | H   |   |
| ATOM   | 28       | H9B      | 0        | 5.537  | 2.693  | 2.799    | 1.000    | 1.31 | H   |   |
| ATOM   | 29       | C10      | 0        | 7.761  | 3.128  | 1.543    | 1.000    | 1.42 | C   |   |
| ANISOU | 29       | C10      | 0        | 149    | 188    | 169      | -18      | -1   | 14  | C |
| ATOM   | 30       | H10      | 0        | 7.796  | 2.821  | 2.439    | 1.000    | 1.59 | H   |   |
| ATOM   | 31       | C11      | 0        | 7.895  | 4.642  | 1.529    | 1.000    | 1.75 | C   |   |
| ANISOU | 31       | C11      | 0        | 147    | 207    | 271      | -20      | -17  | -15 | C |
| ATOM   | 32       | H11A     | 0        | 7.162  | 5.076  | 1.964    | 1.000    | 1.97 | H   |   |
| ATOM   | 33       | H11B     | 0        | 7.919  | 4.936  | 0.622    | 1.000    | 2.27 | H   |   |
| ATOM   | 34       | H11C     | 0        | 8.733  | 4.898  | 1.964    | 1.000    | 2.83 | H   |   |
| ATOM   | 35       | C12      | 0        | 8.856  | 2.473  | 0.714    | 1.000    | 1.95 | C   |   |
| ANISOU | 35       | C12      | 0        | 157    | 231    | 309      | 3        | 13   | -43 | C |
| ATOM   | 36       | H12A     | 0        | 8.789  | 2.855  | -0.197   | 1.000    | 2.23 | H   |   |
| ATOM   | 37       | H12B     | 0        | 8.739  | 1.557  | 0.738    | 1.000    | 3.11 | H   |   |
| ATOM   | 38       | H12C     | 0        | 9.738  | 2.725  | 1.053    | 1.000    | 3.99 | H   |   |

END

<sup>1</sup>H NMR of Free Base Sotalol\_MeOD

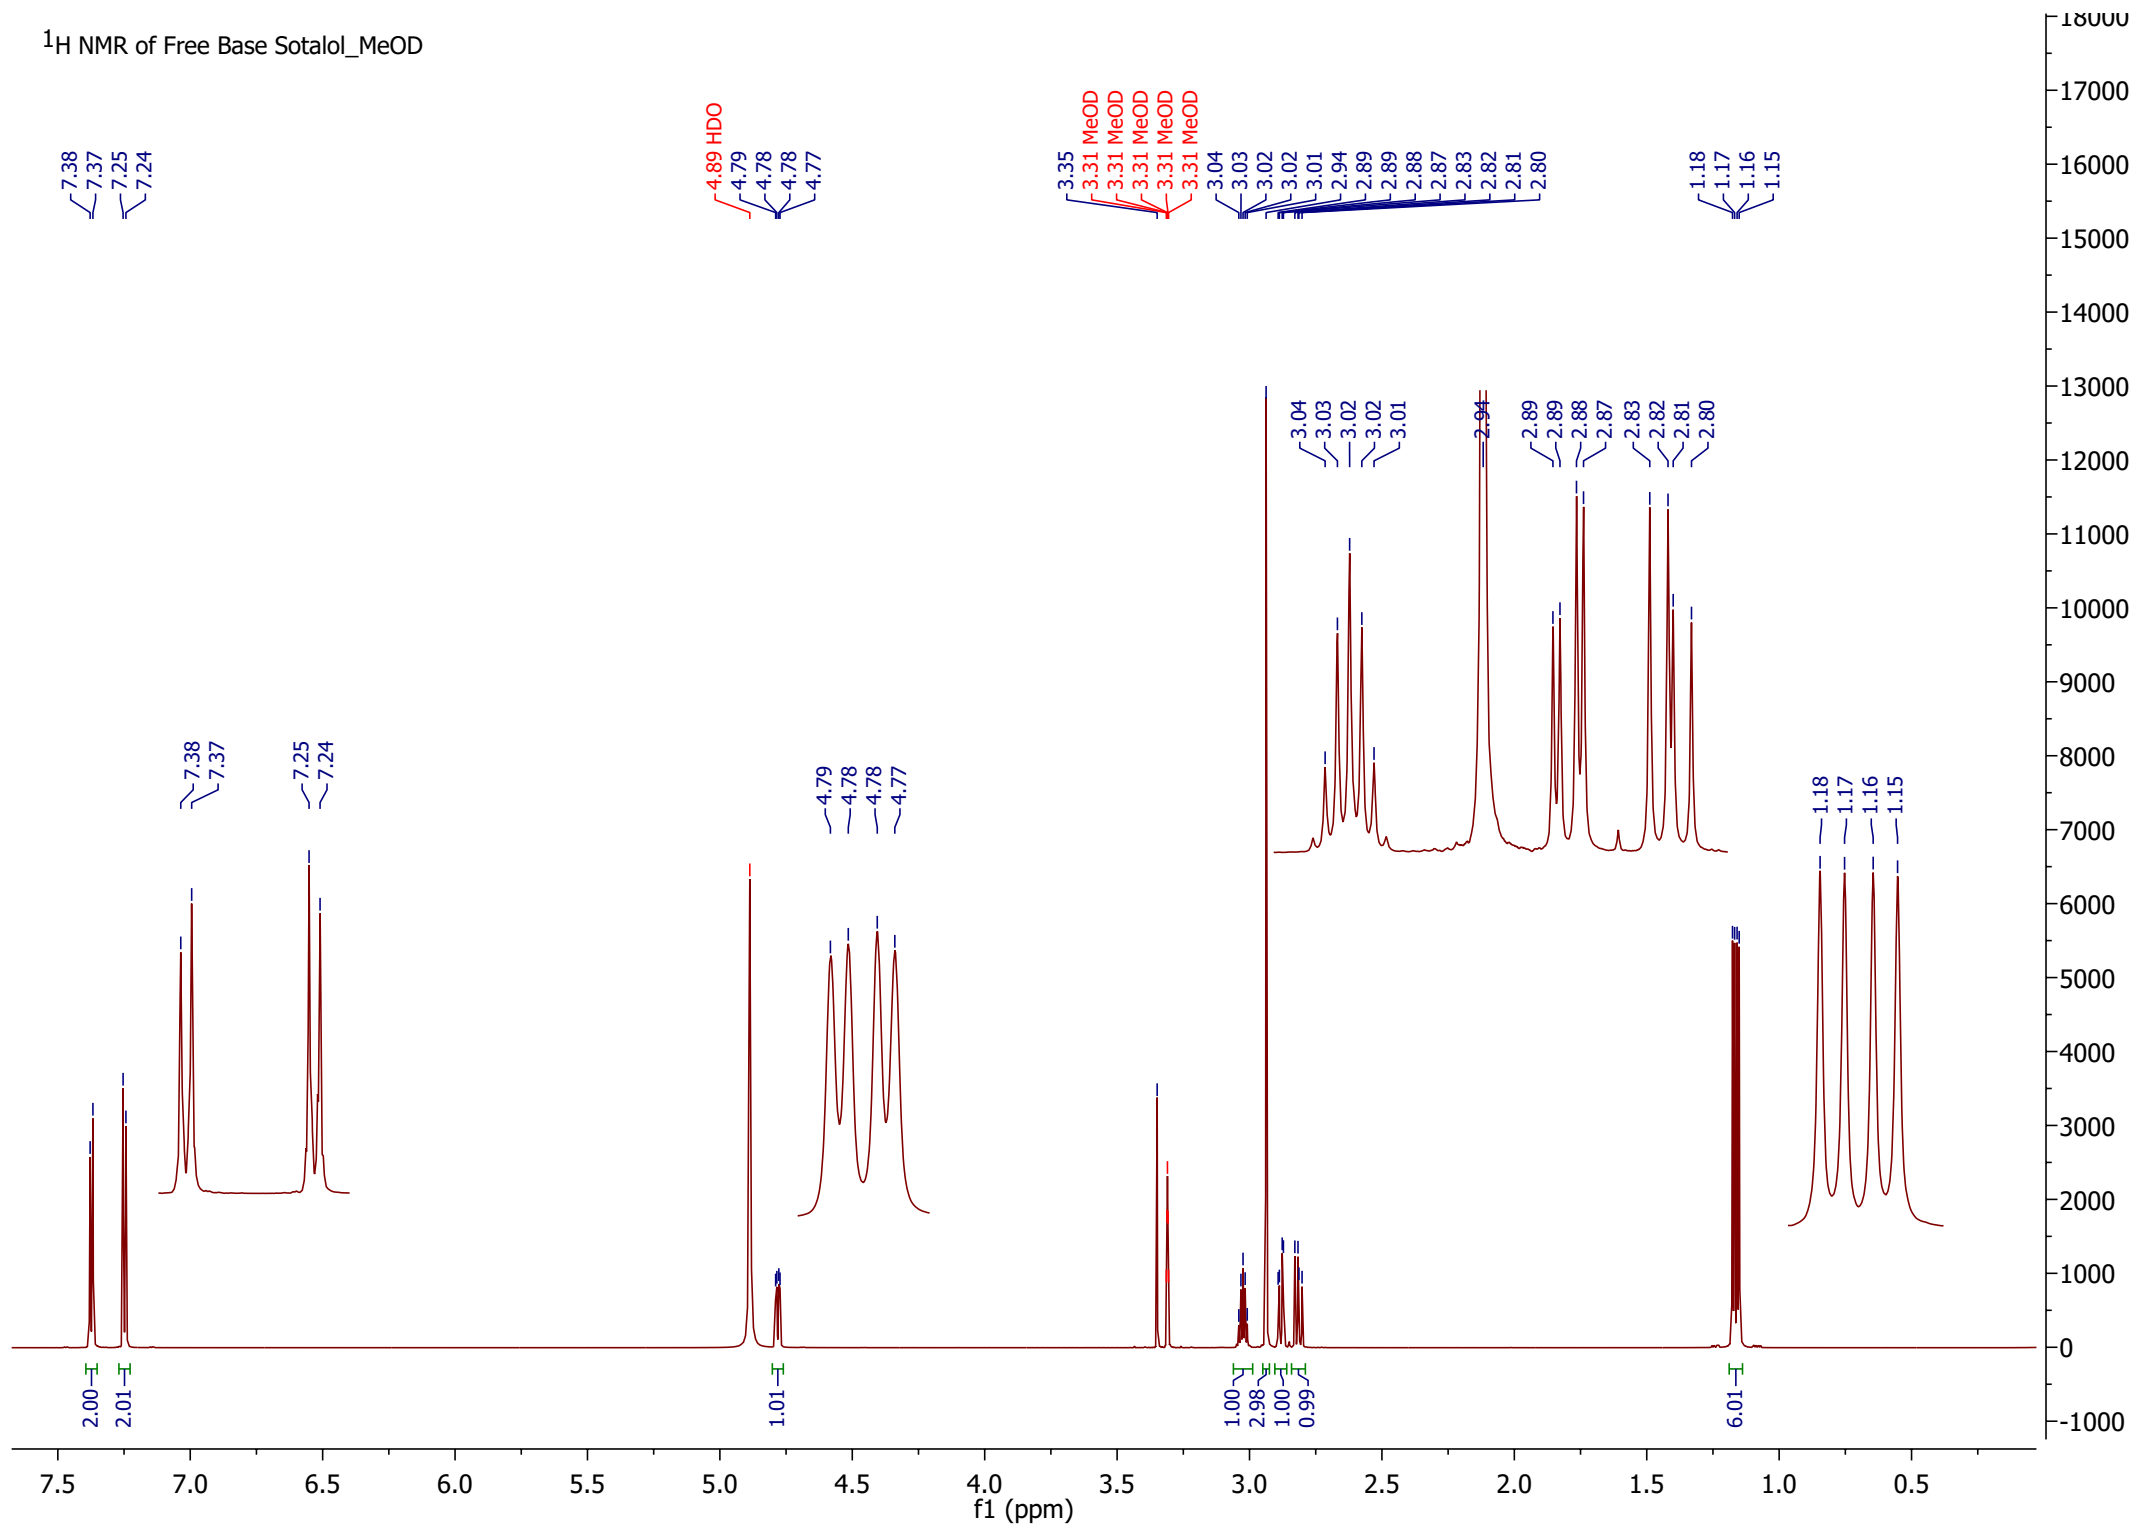



<sup>13</sup>C NMR of Free Base Sotalol\_MeOD

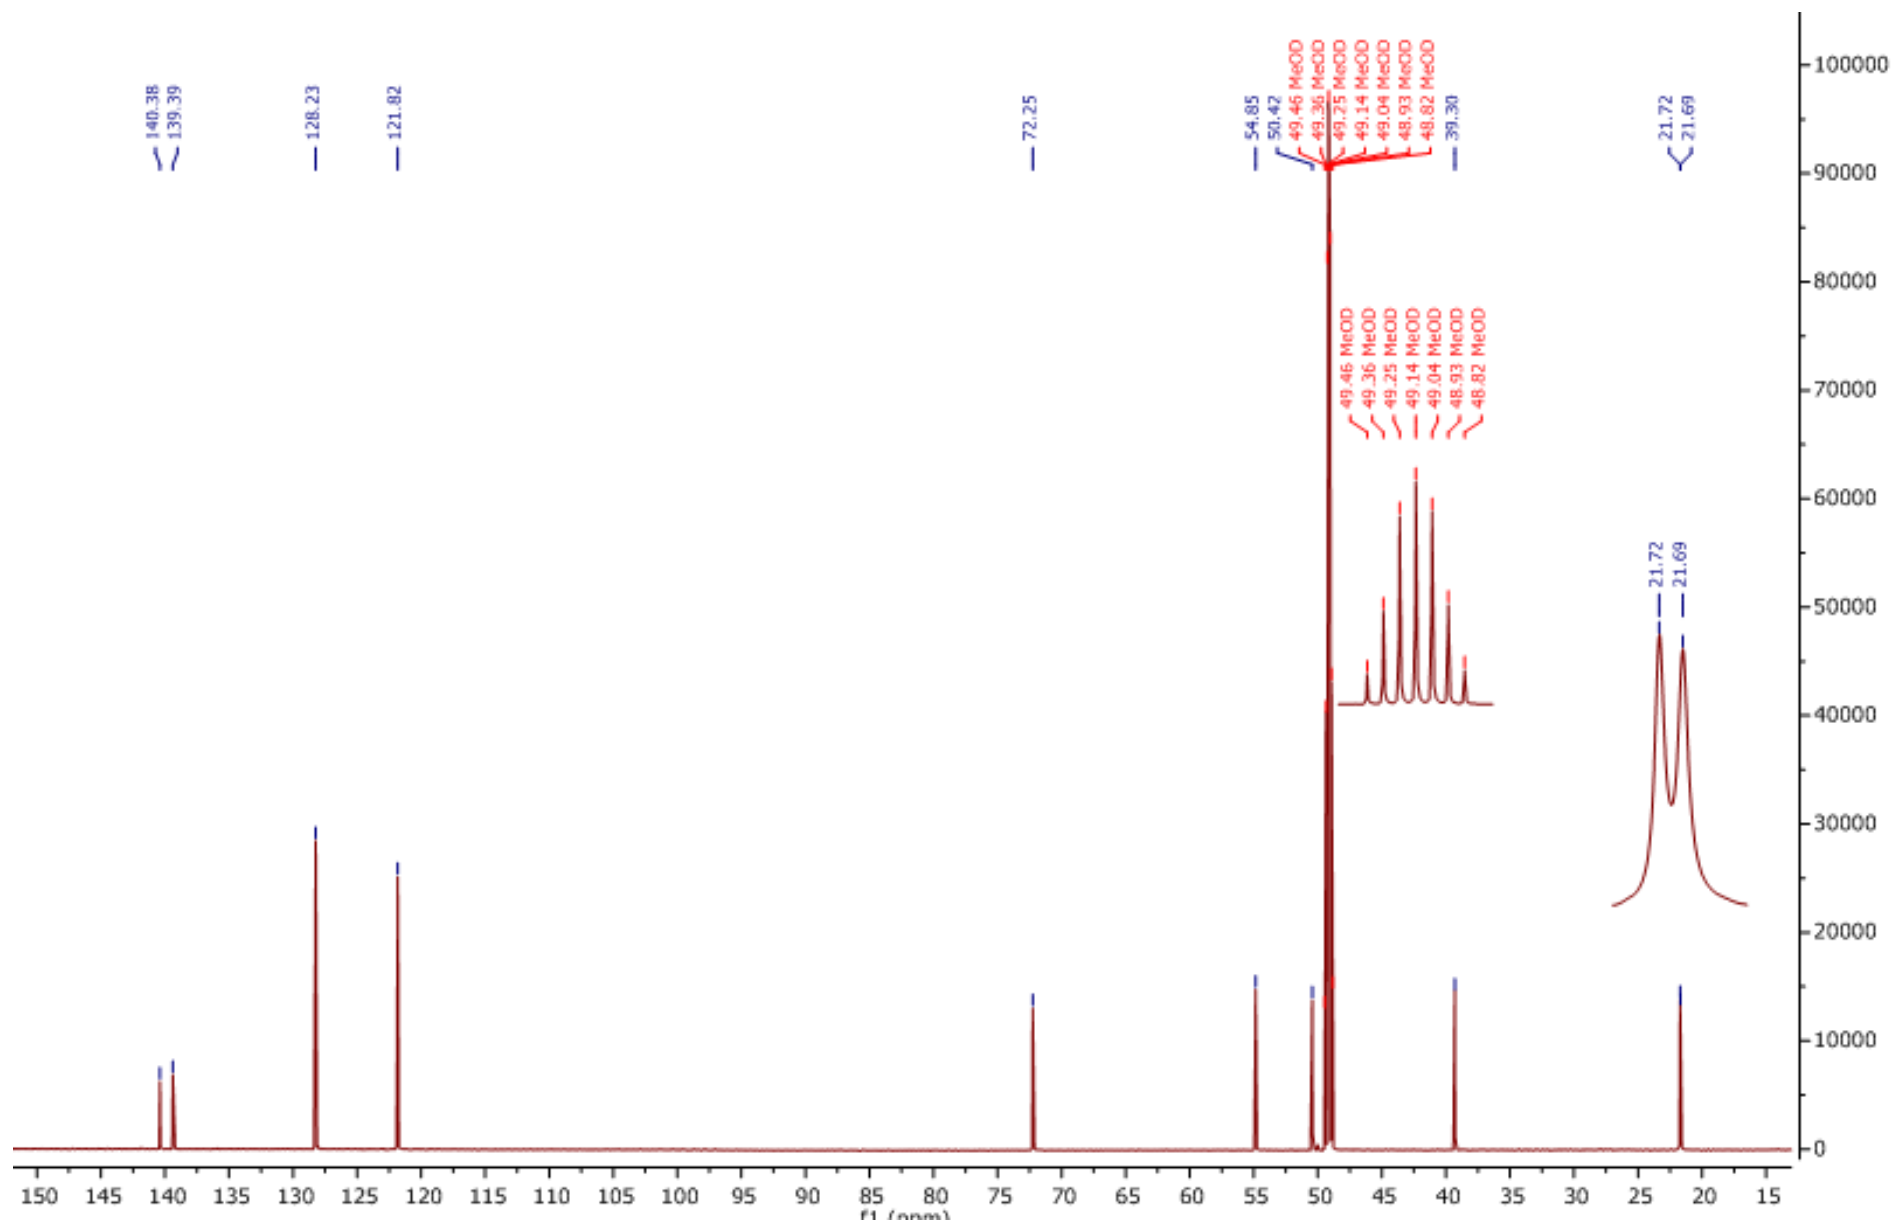

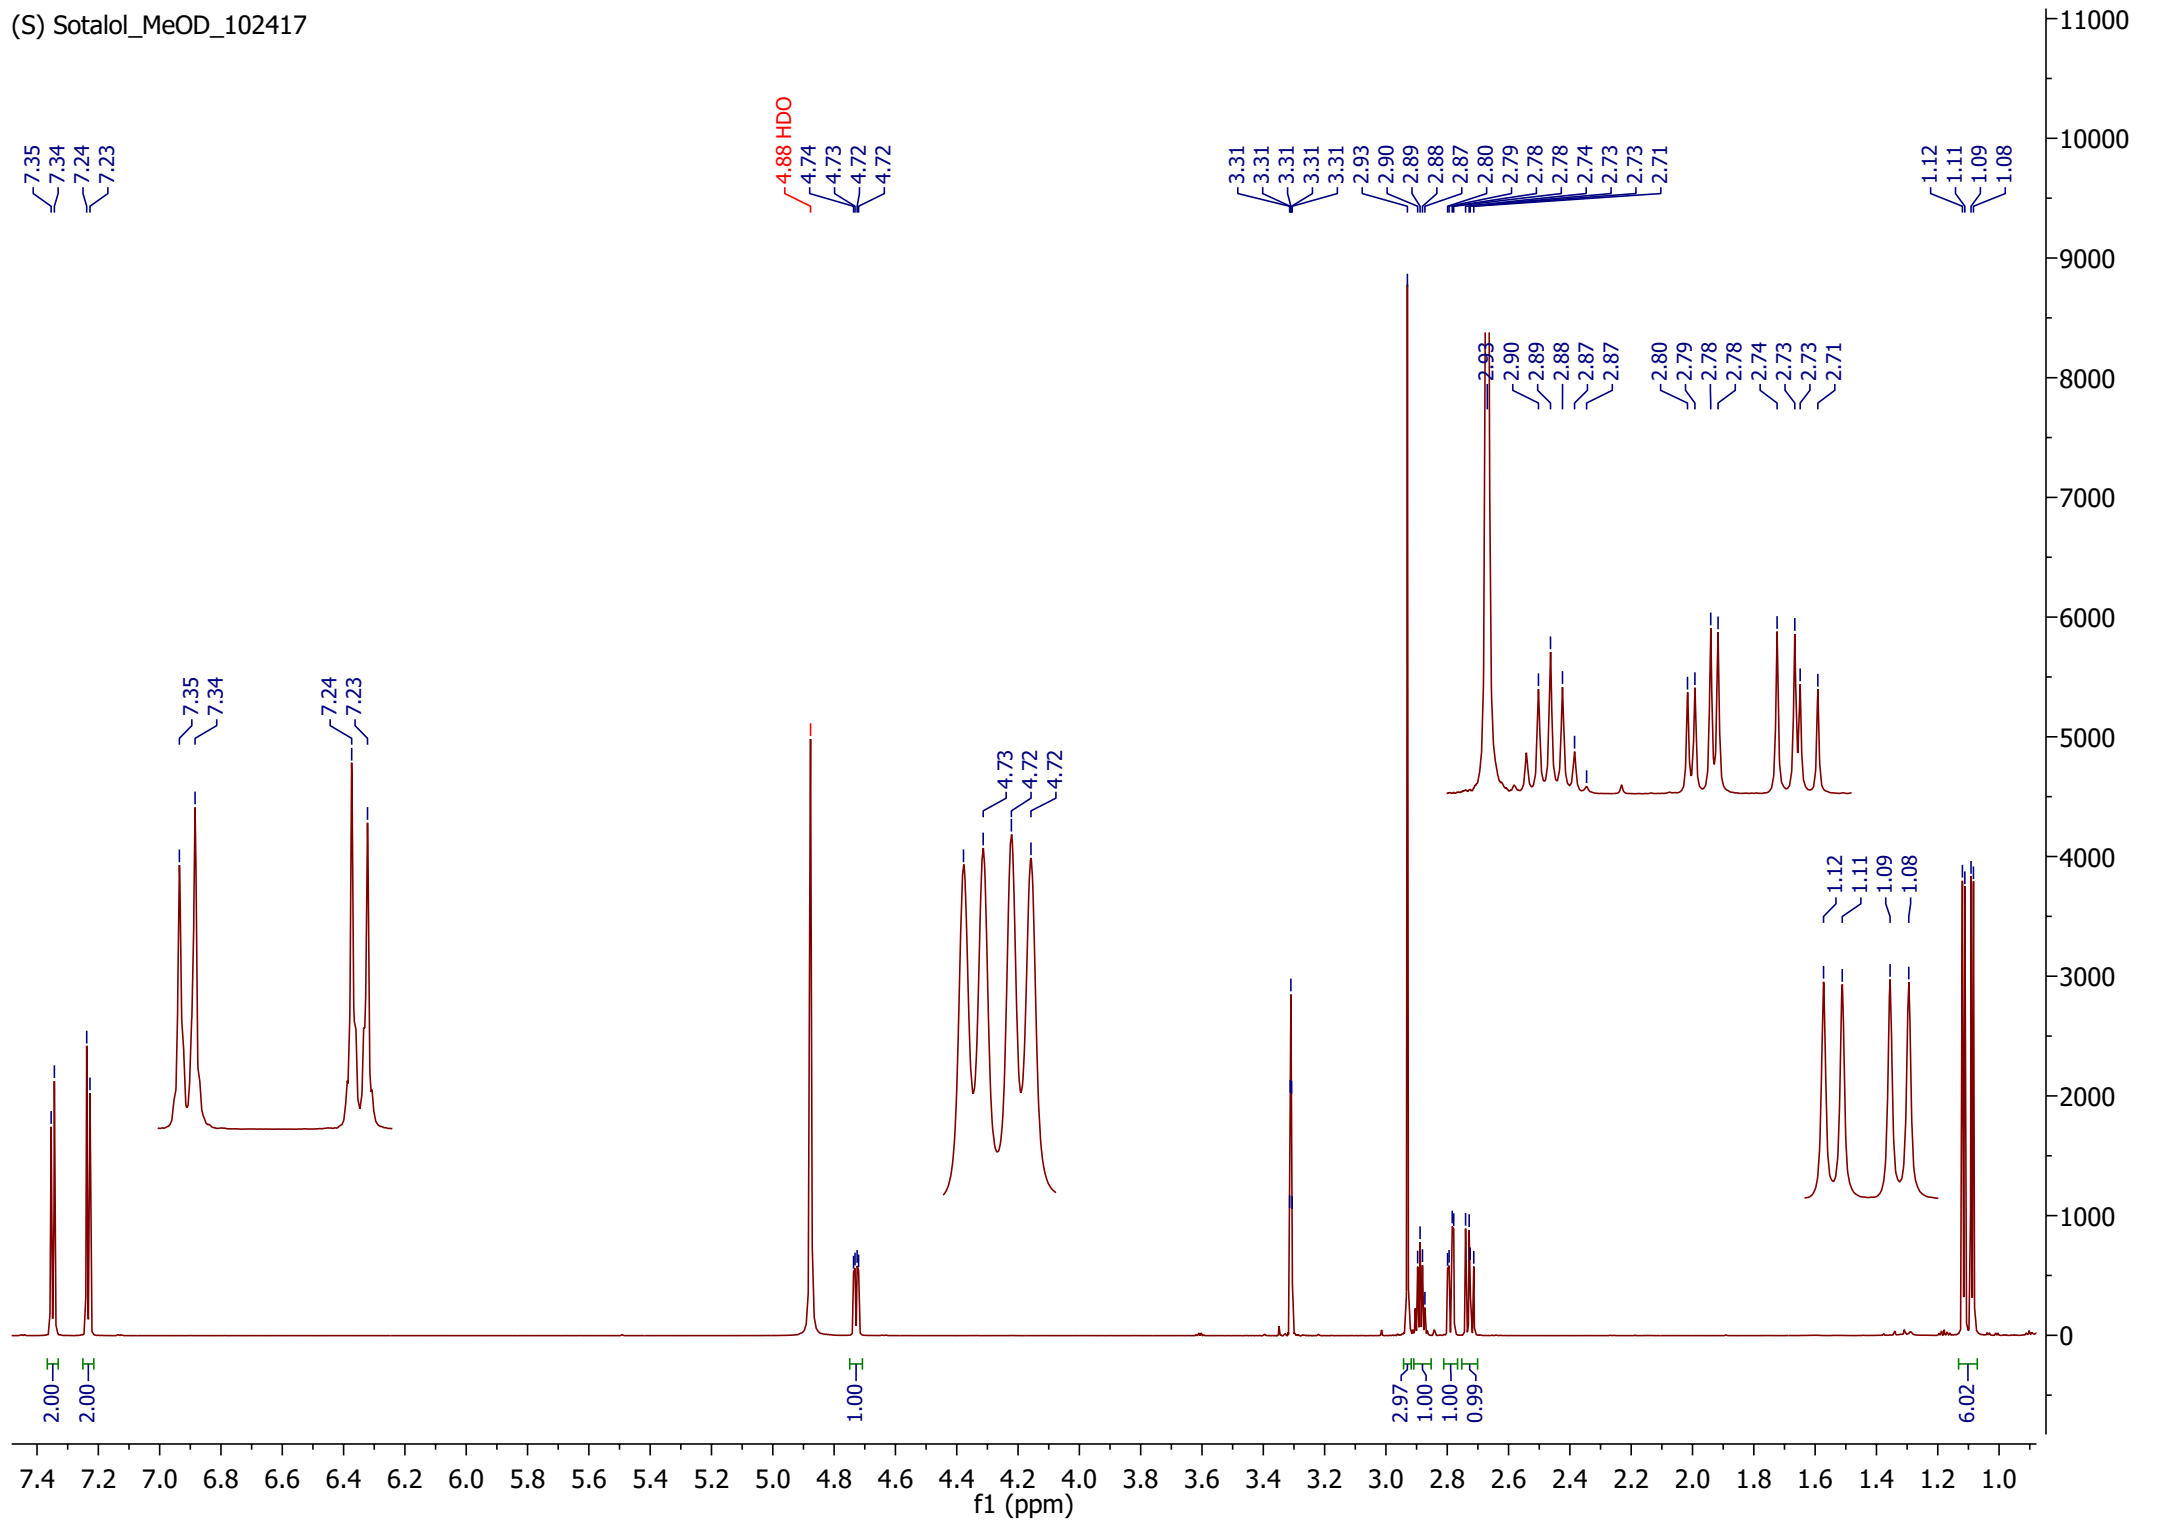

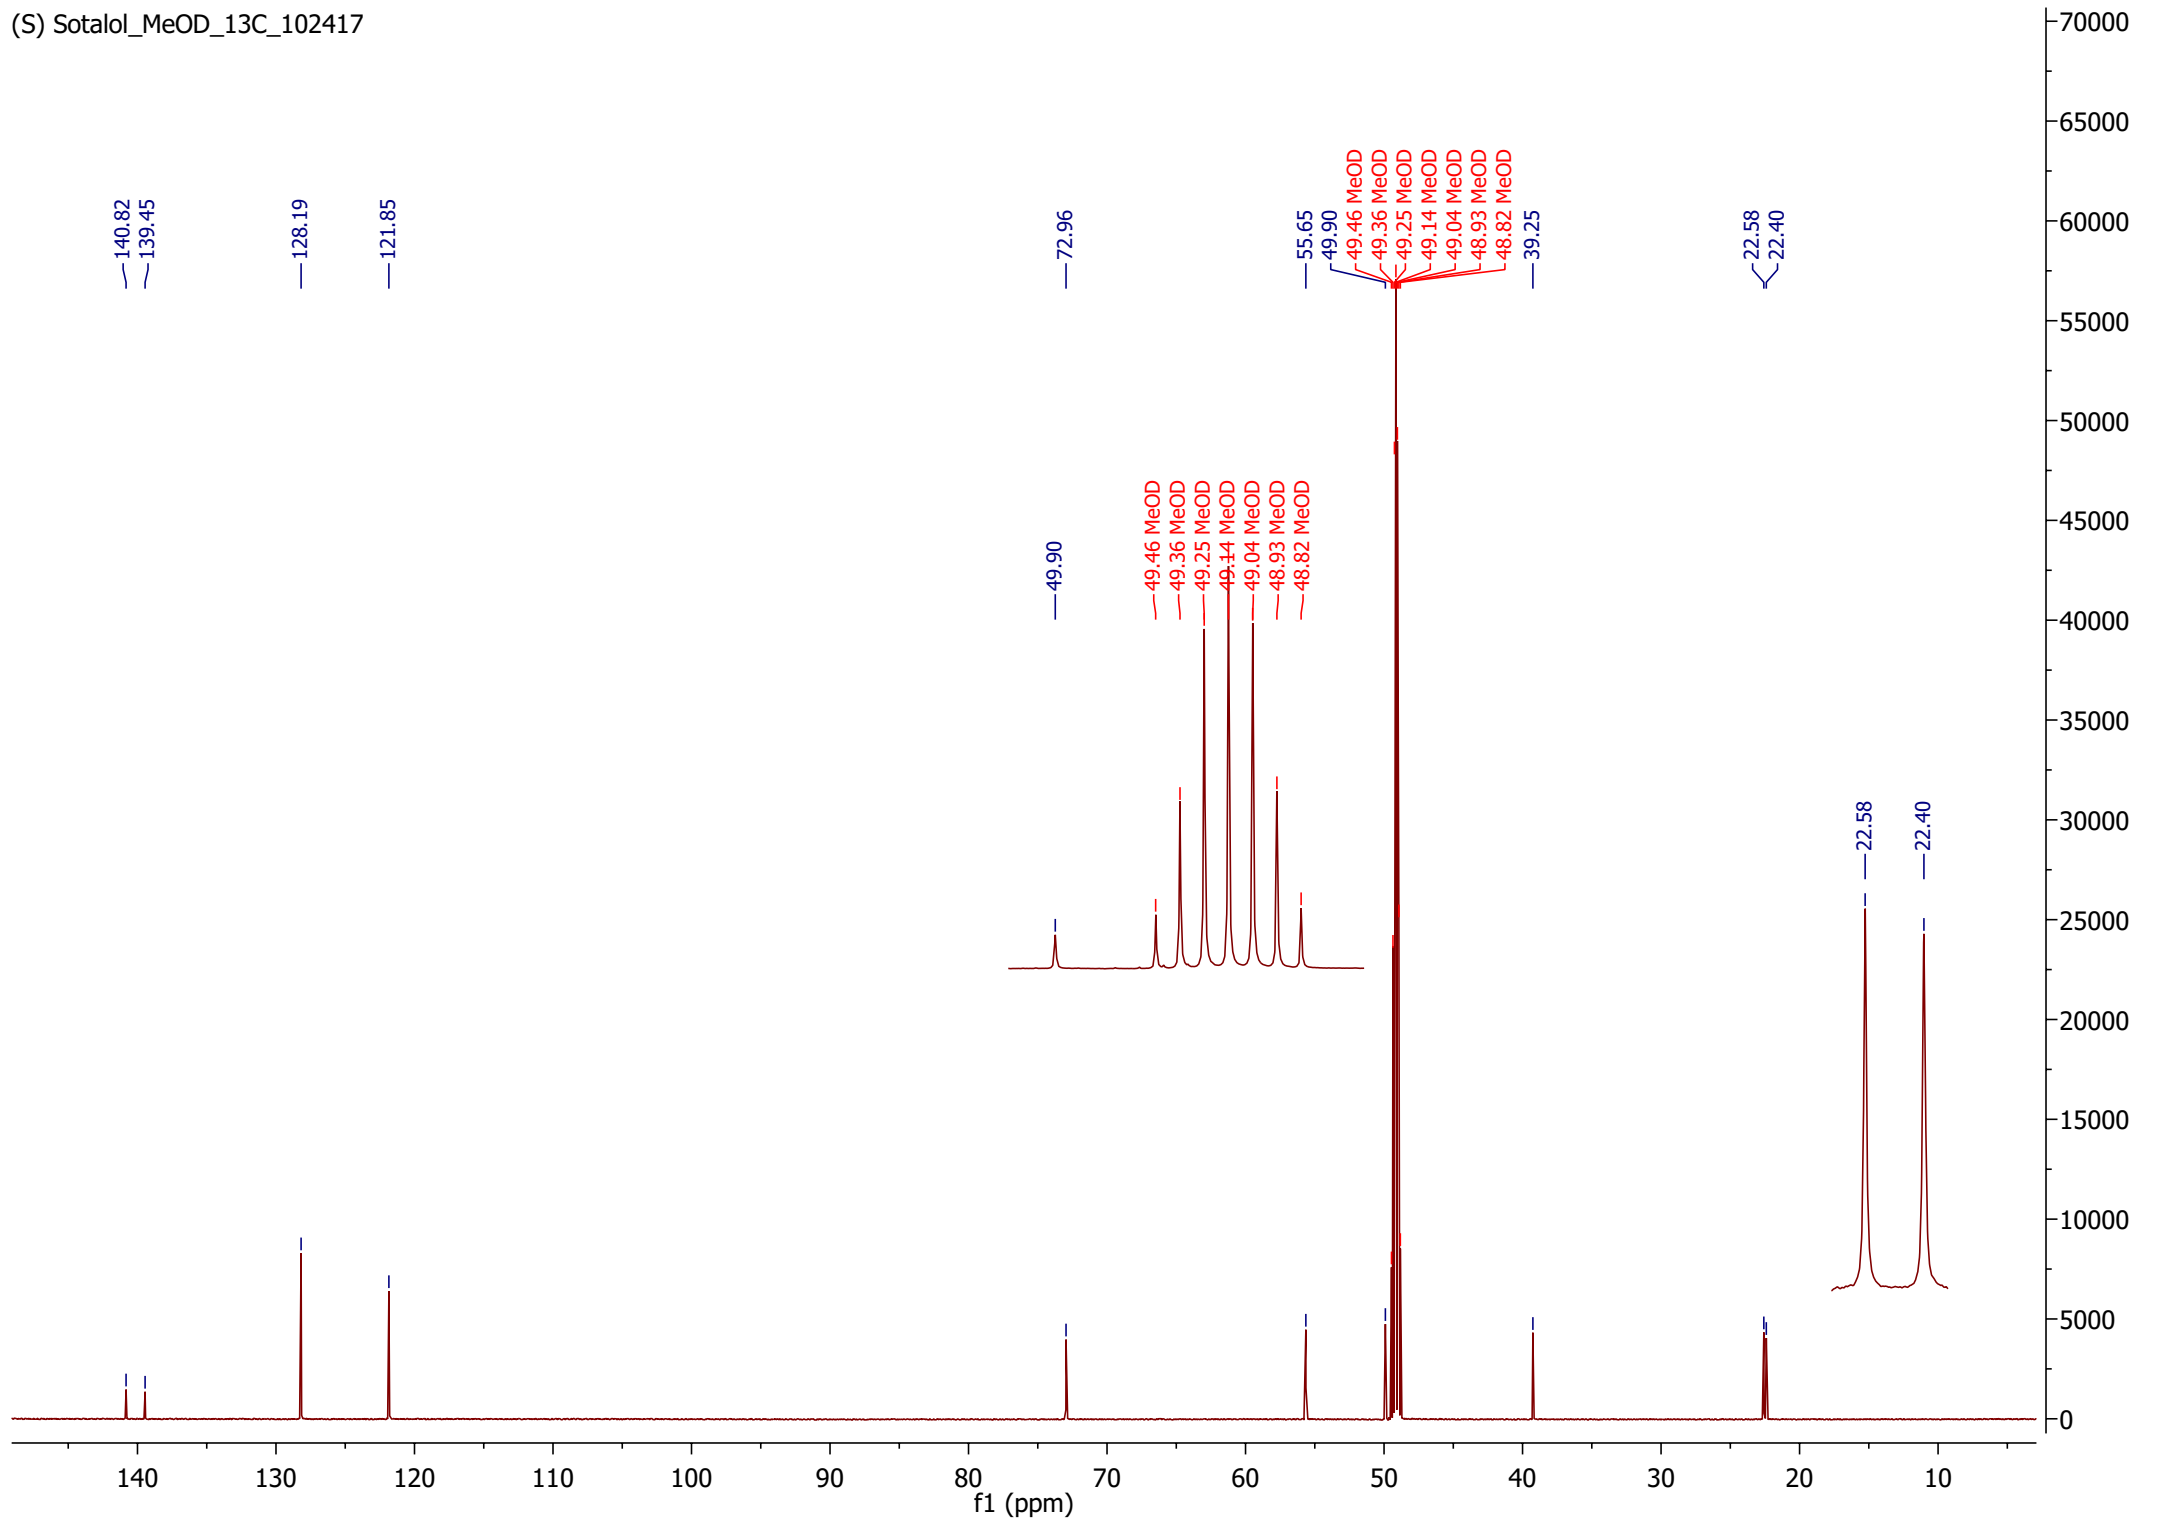

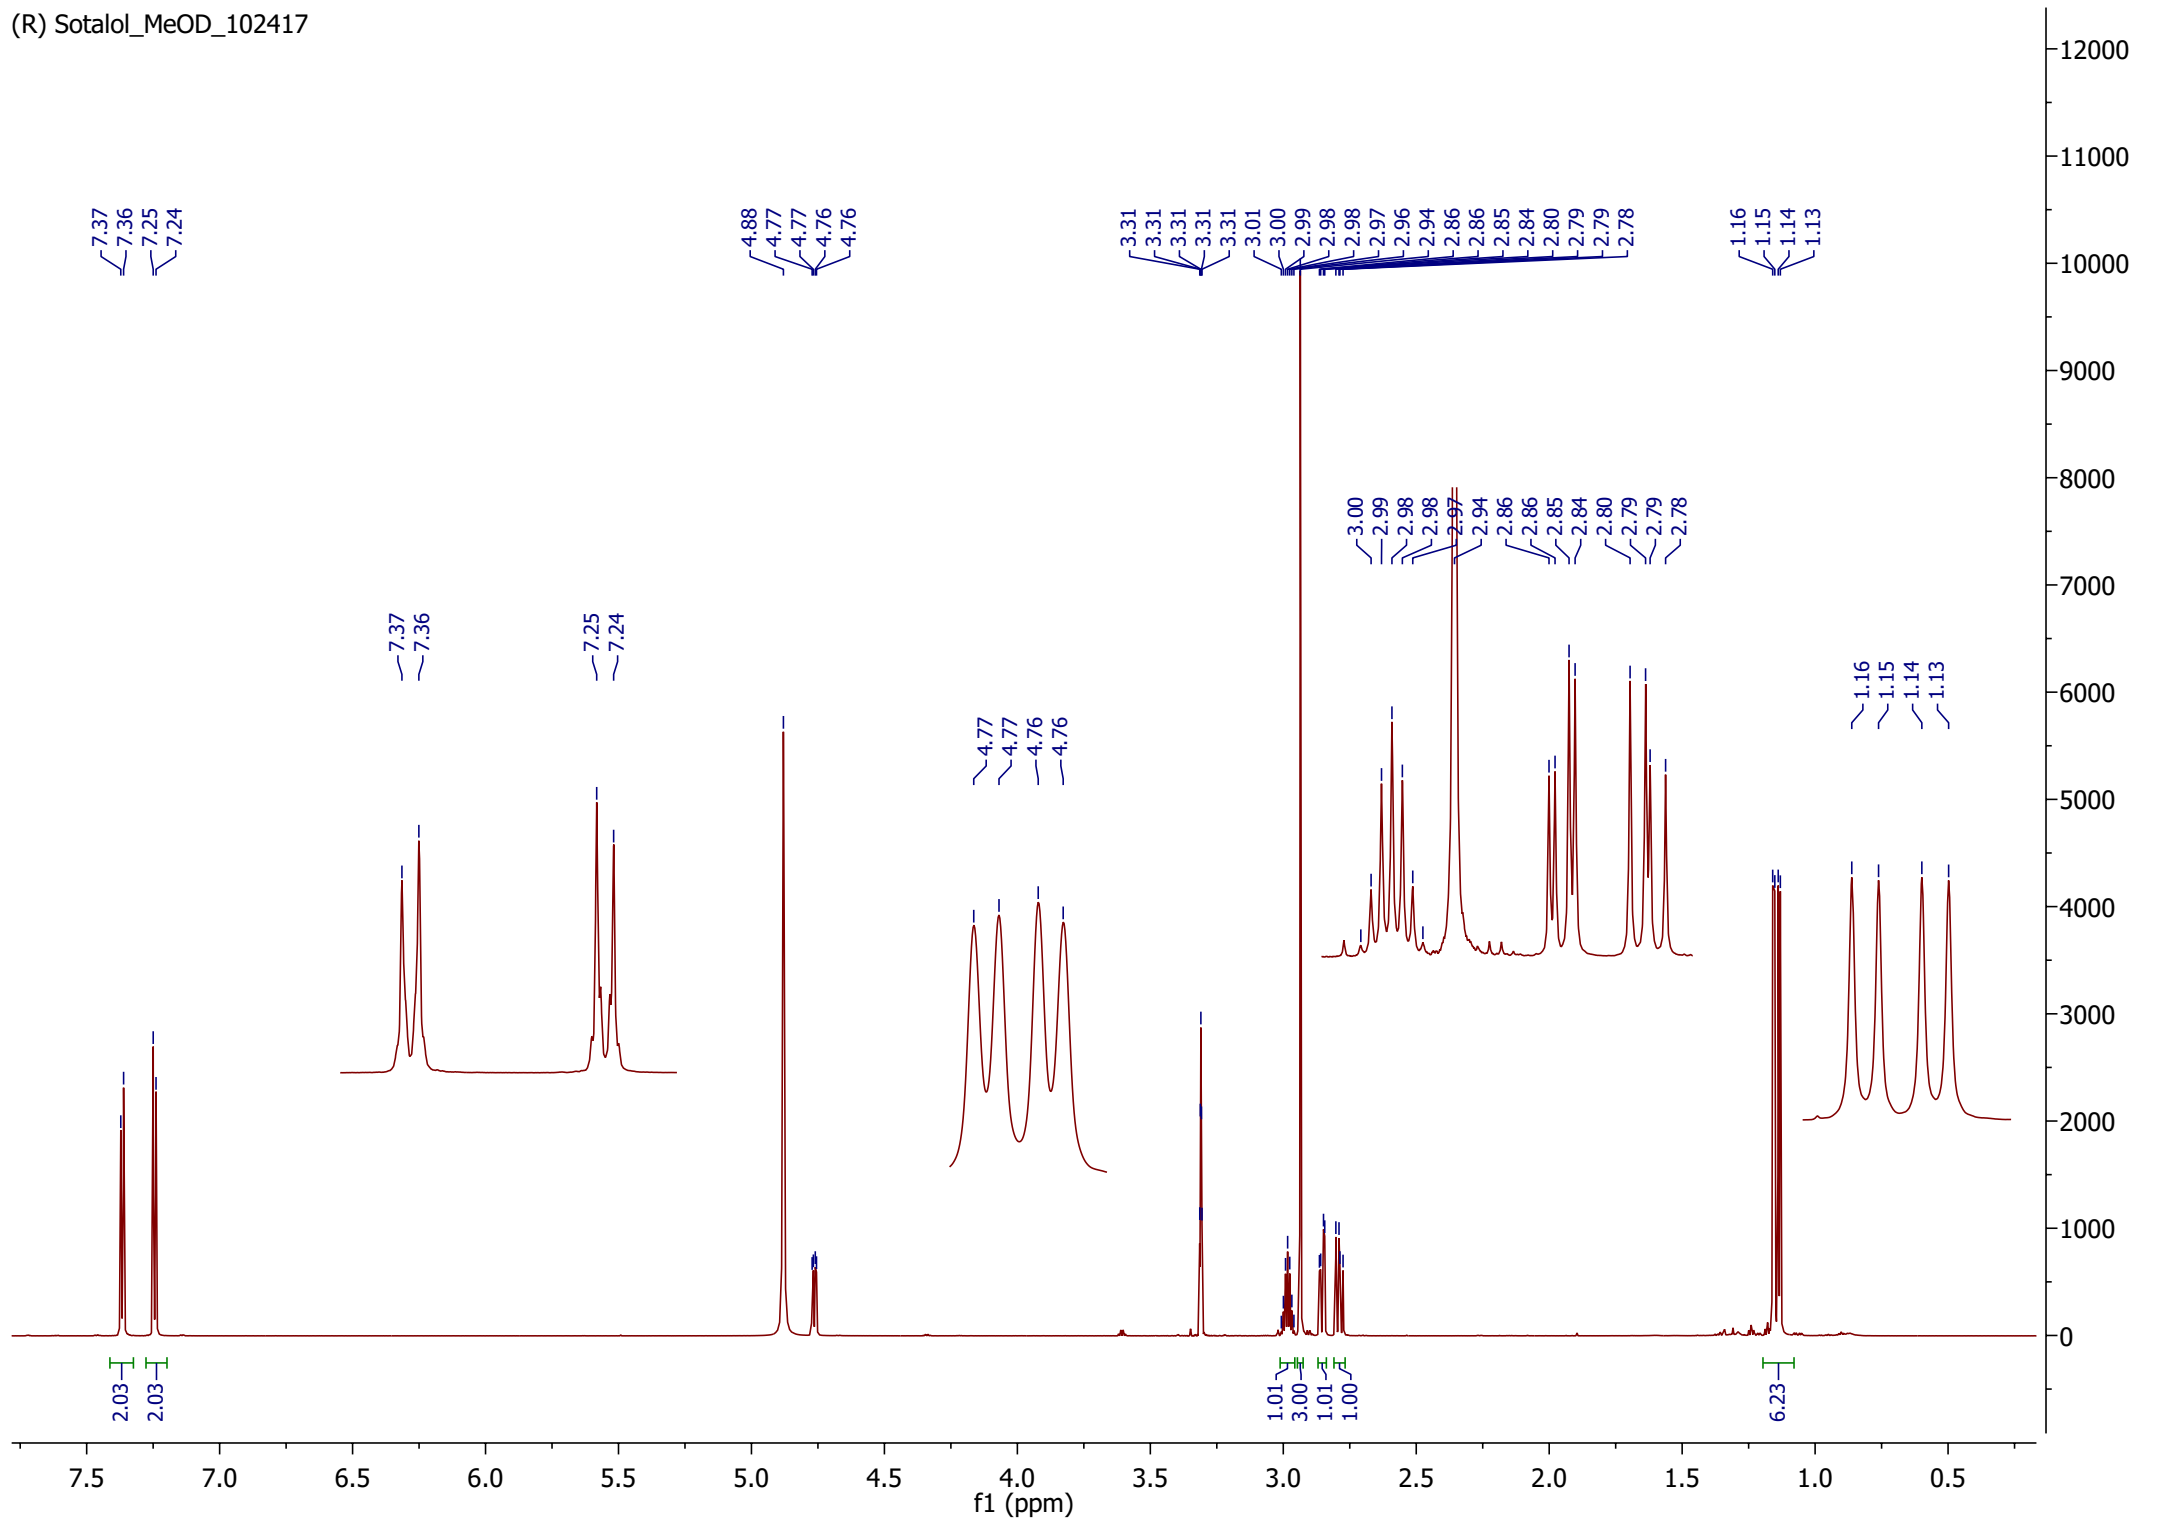

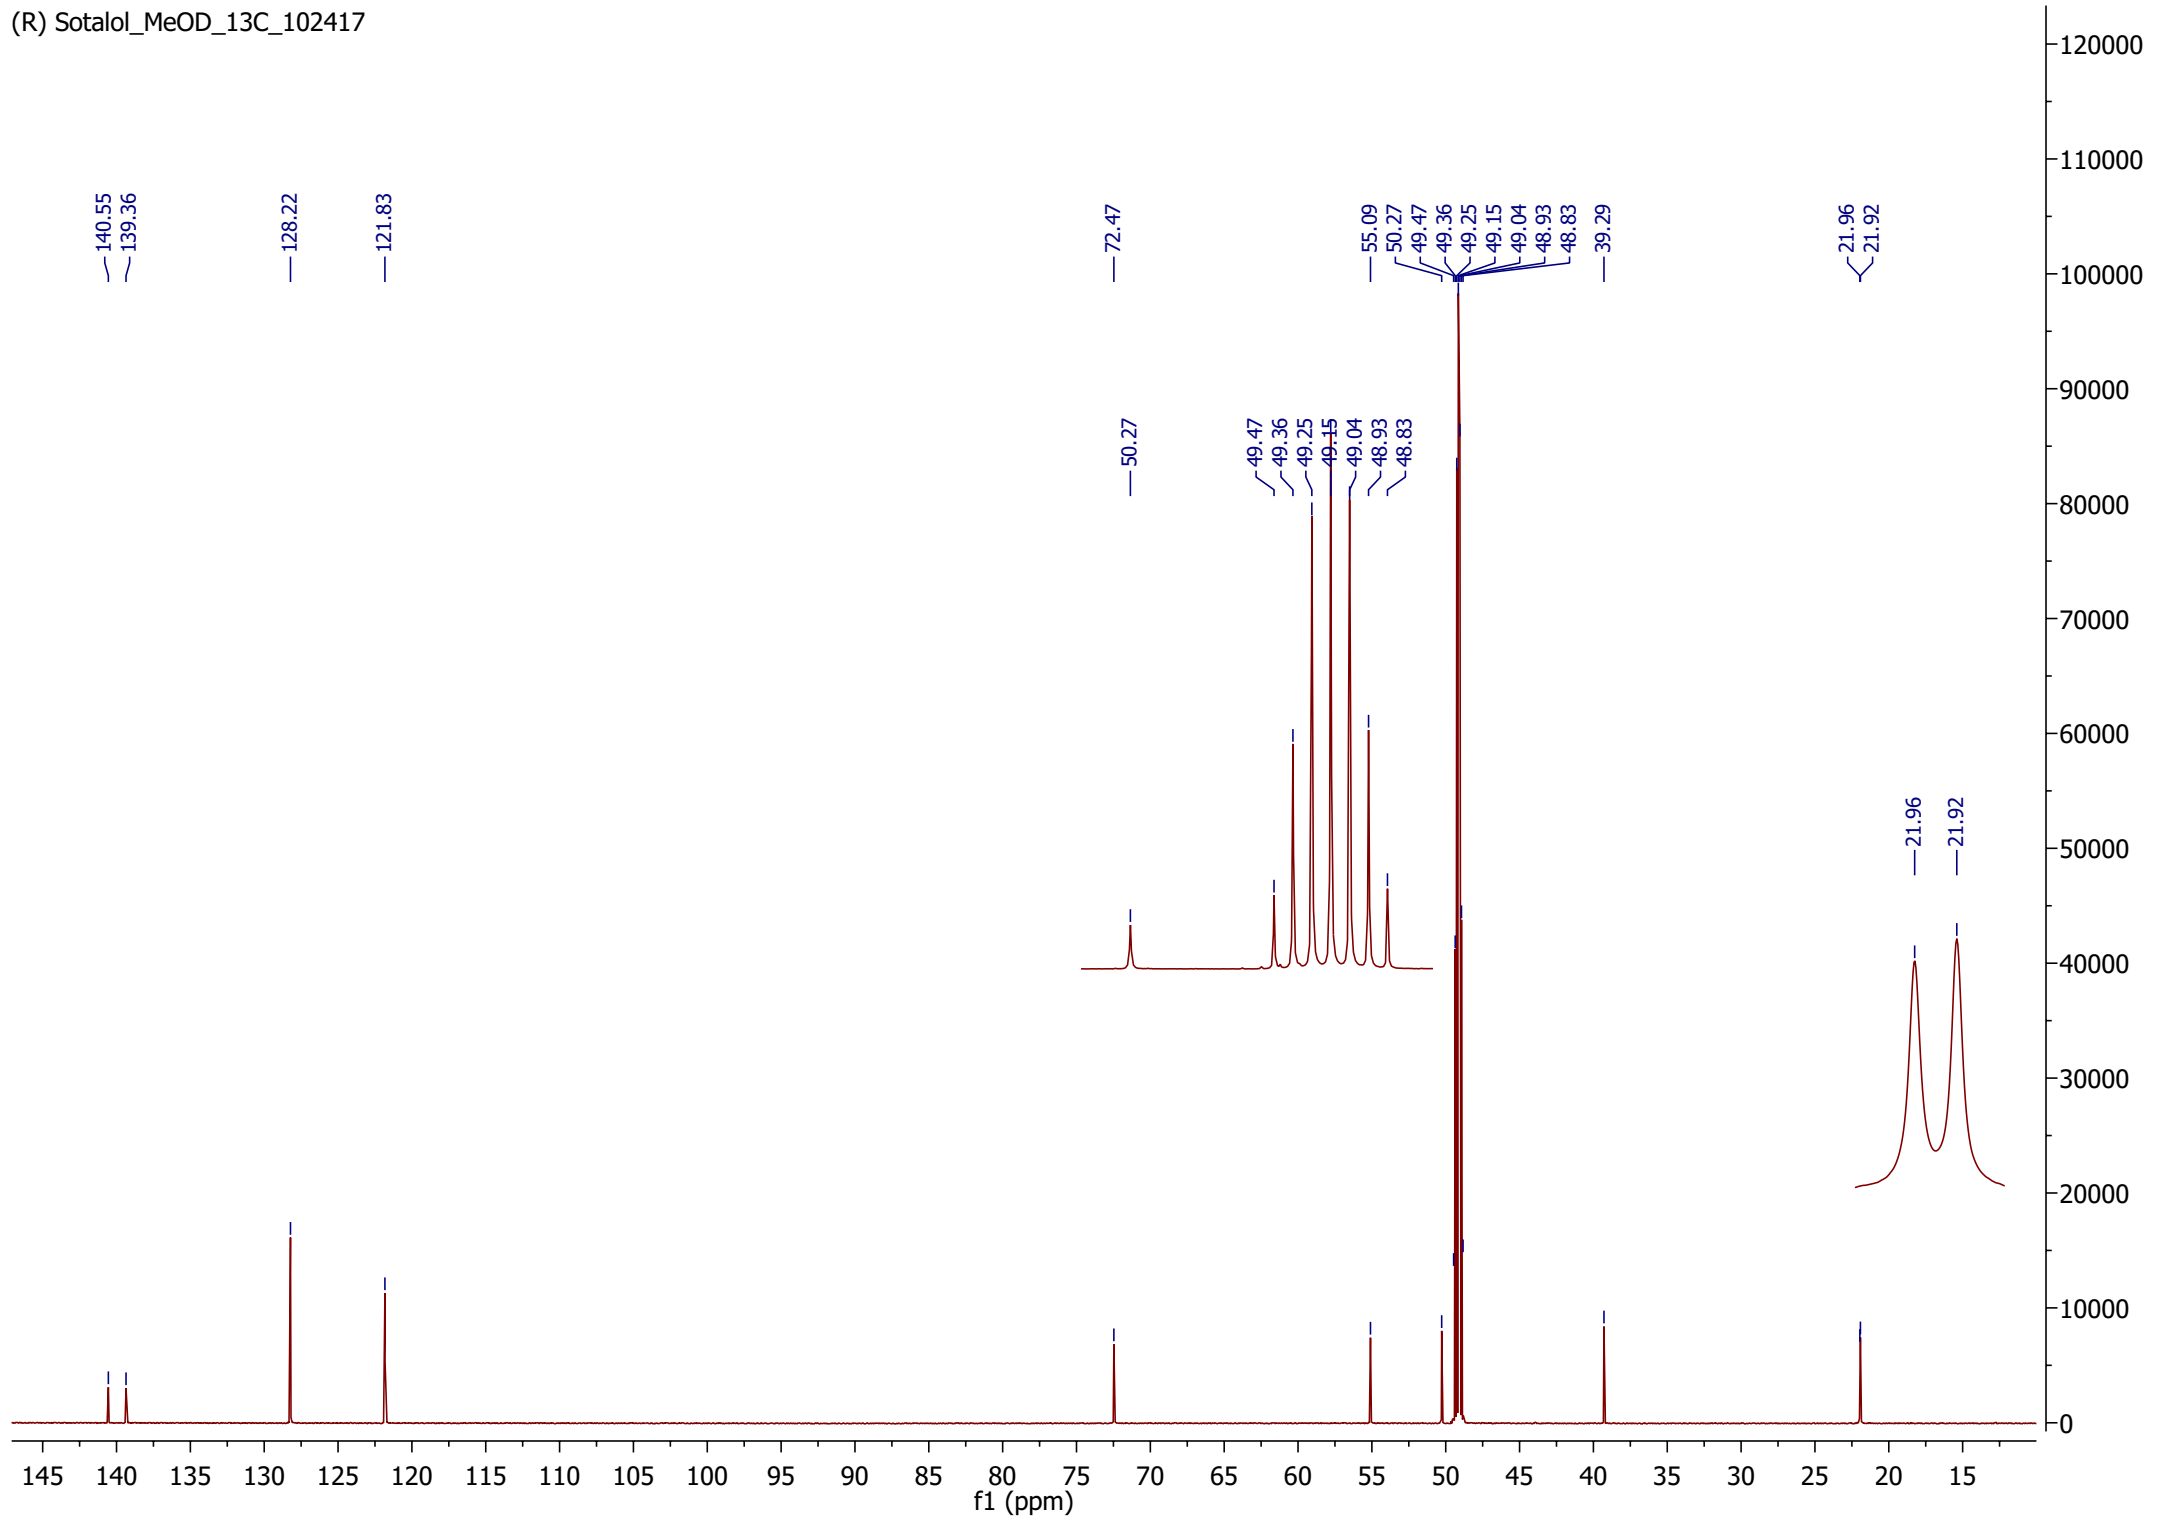

6388\_Pos #8-12 RT: 0.07-0.11 AV: 5 NL: 5.84E7  
T: FTMS + p ESI Full ms [110.00-1500.00]

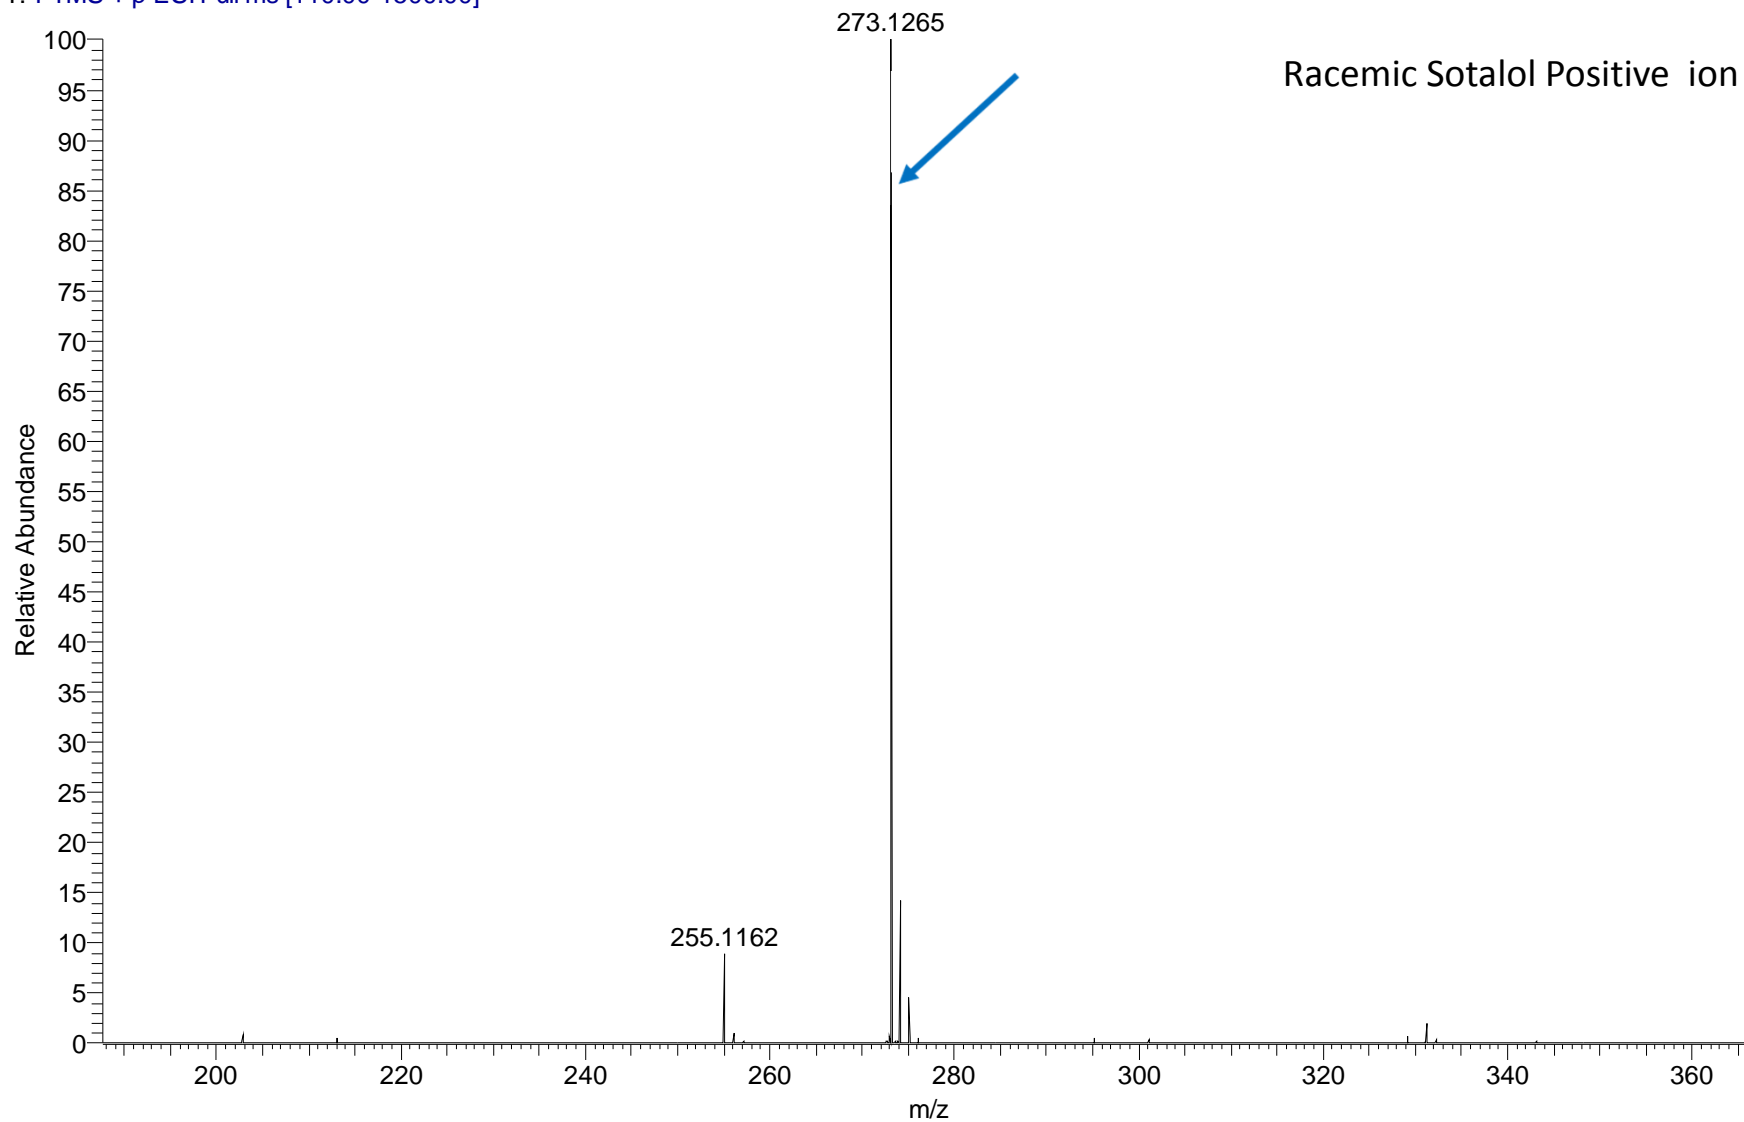

Racemic Sotalol Positive ion mode

6389\_Pos #3-7 RT: 0.02-0.06 AV: 5 NL: 2.76E7  
T: FTMS + p ESI Full ms [110.00-1500.00]

S (+) Sotalol Positive ion mode

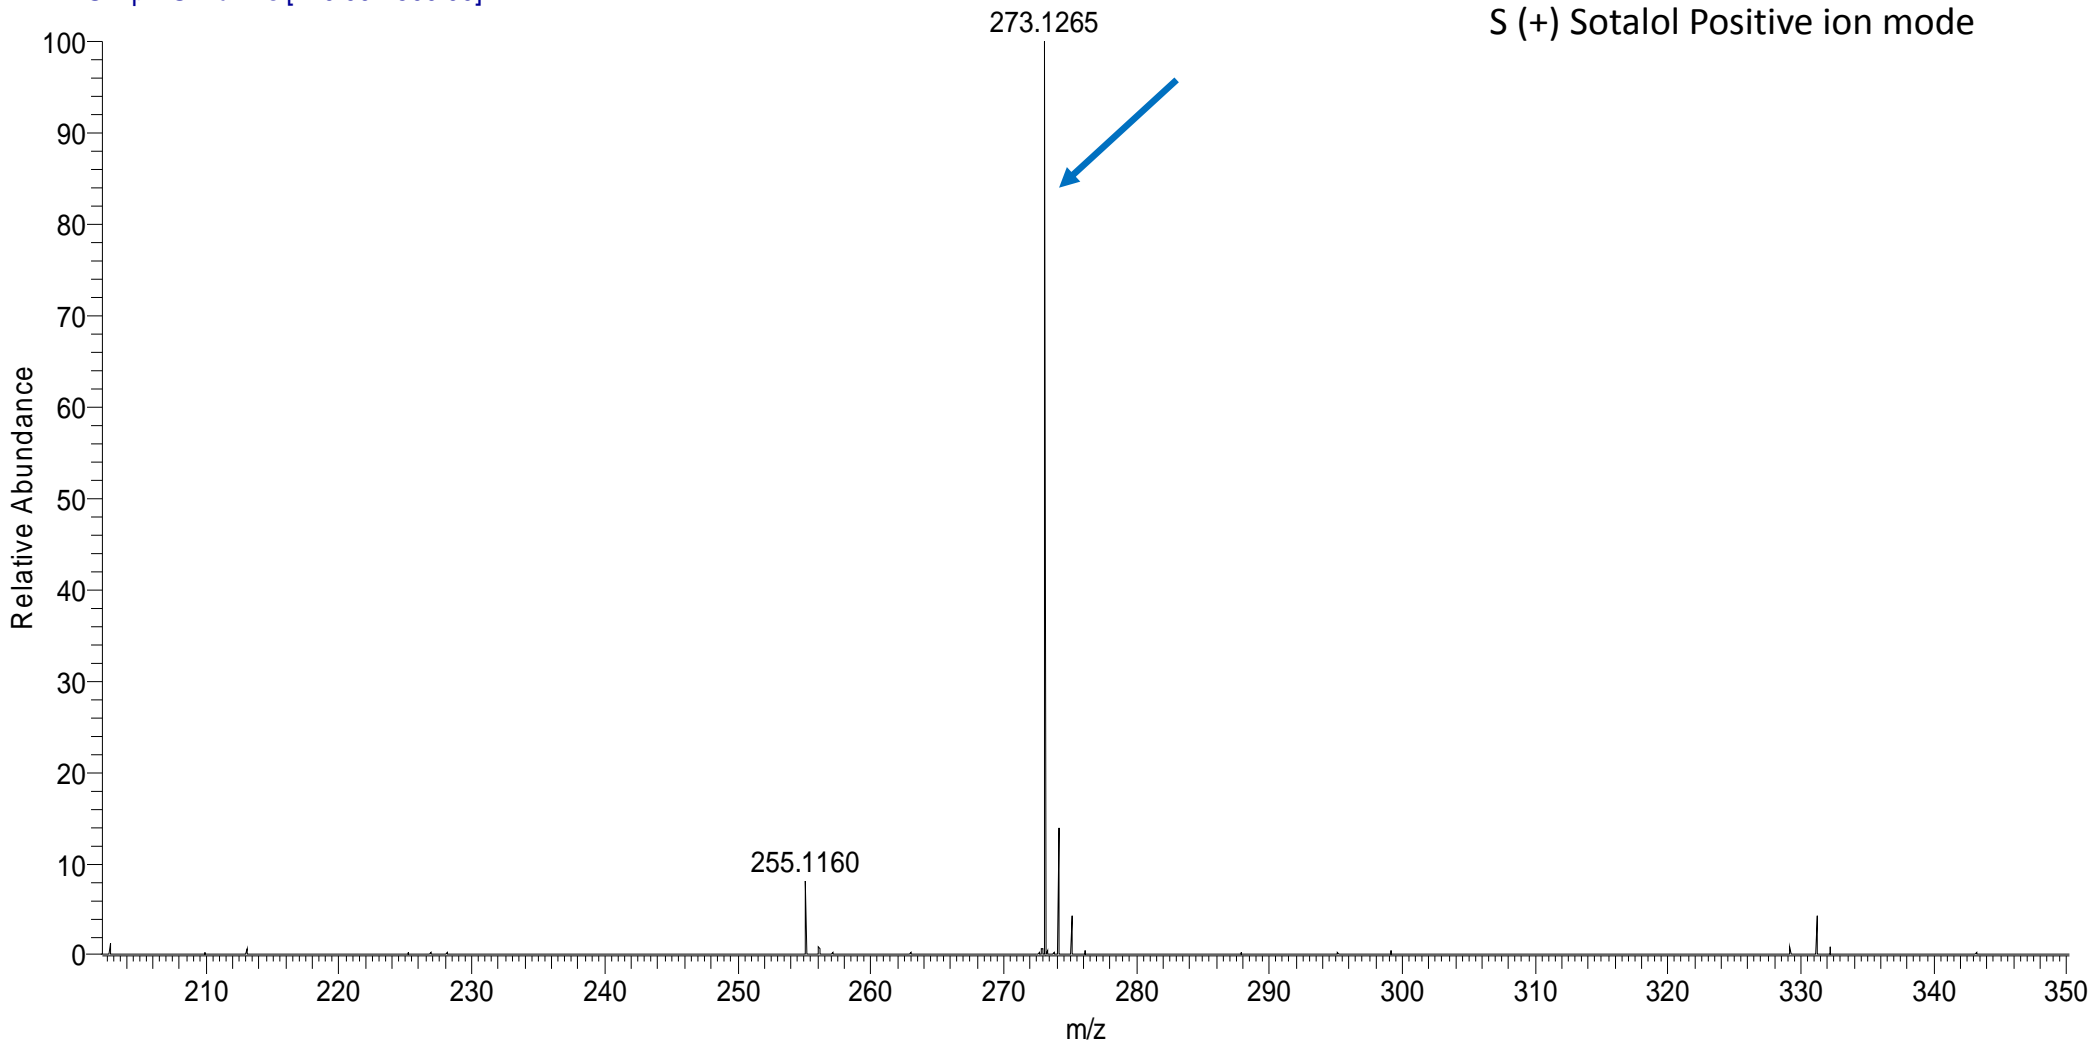

6390\_Pos #8-12 RT: 0.07-0.10 AV: 5 NL: 1.70E7  
T: FTMS + p ESI Full ms [110.00-1500.00]

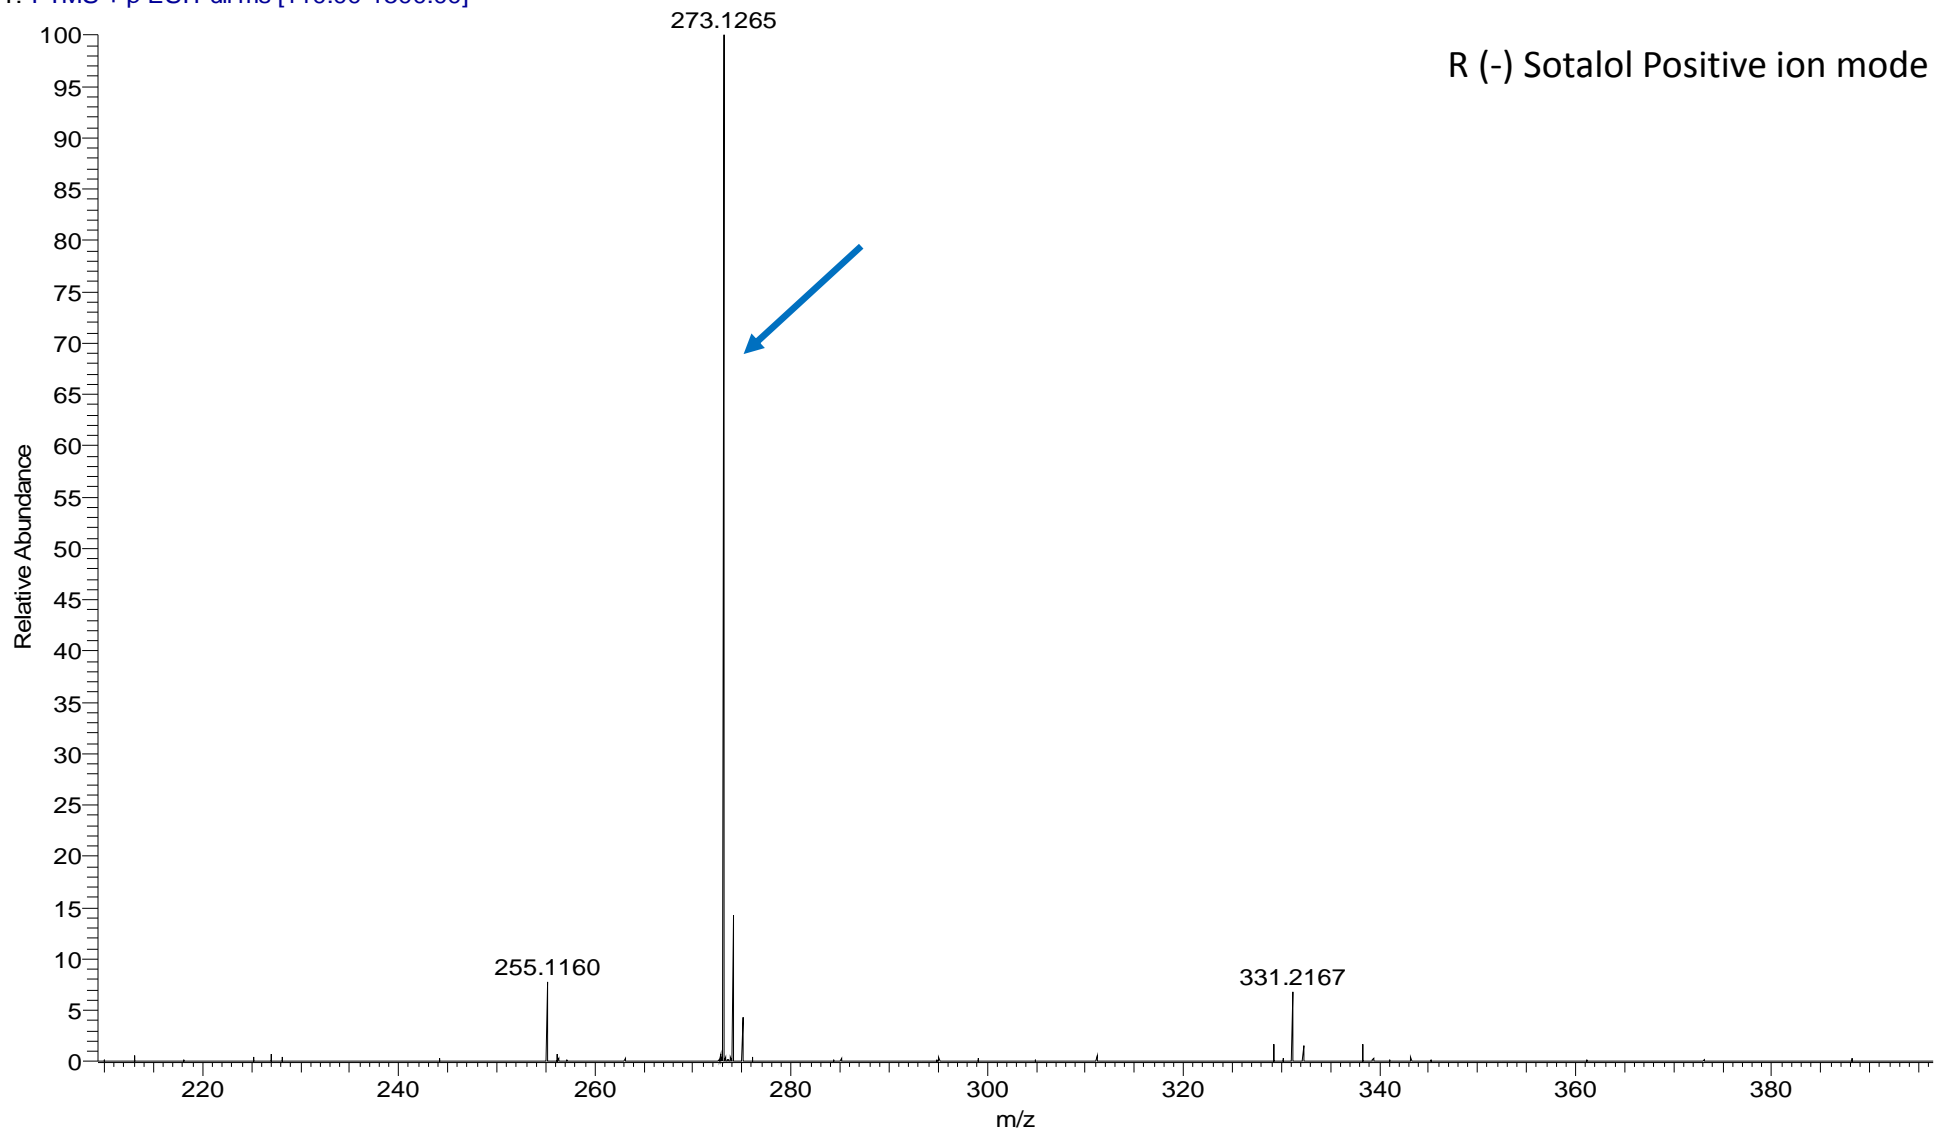

R (-) Sotalol Positive ion mode
